# Supplementary material
Source: PubMed Central journal article supplement (PMC3042178)

### A 0.01 vs. 0 pM

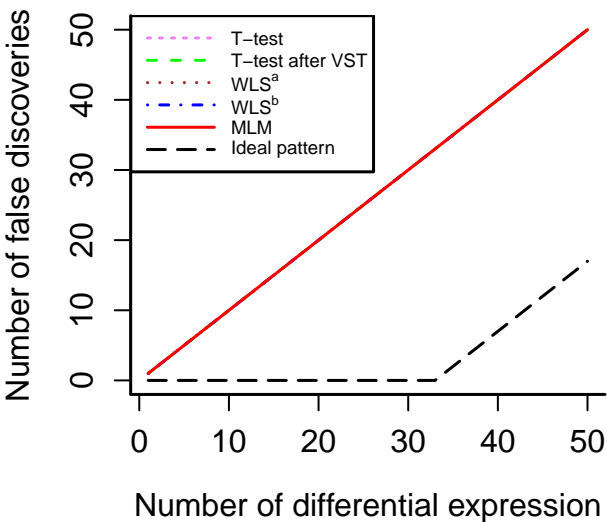

### B 0.01 vs. 0 pM

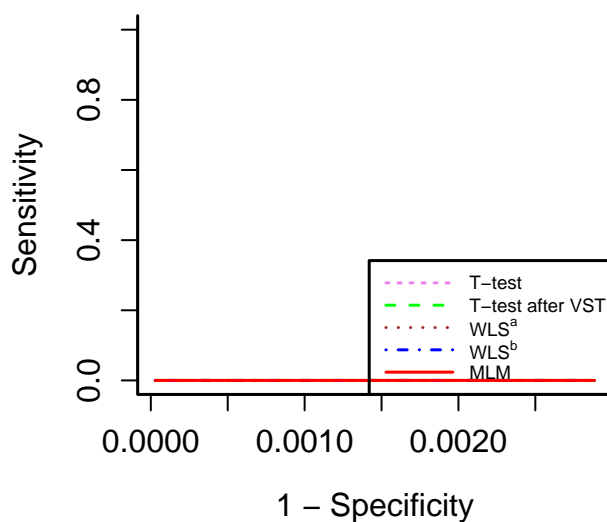

### A 0.03 vs. 0 pM

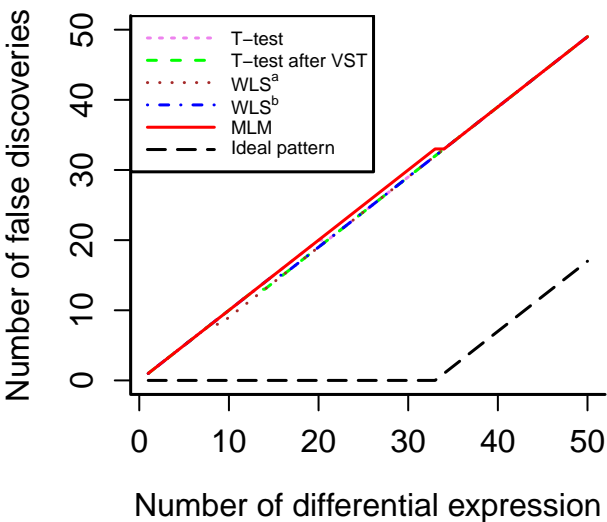

### B 0.03 vs. 0 pM

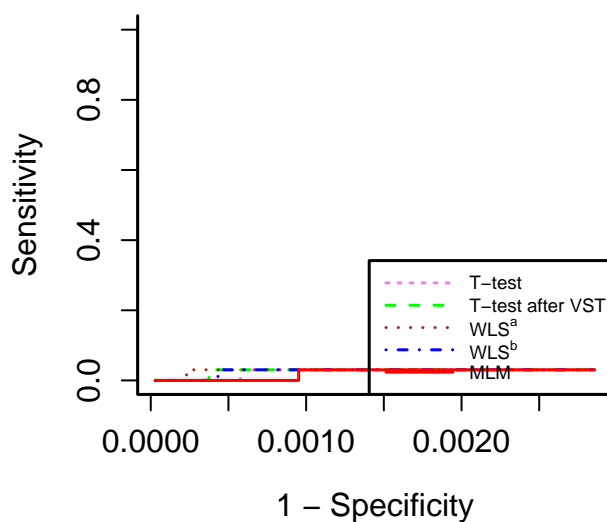

### A 0.1 vs. 0 pM

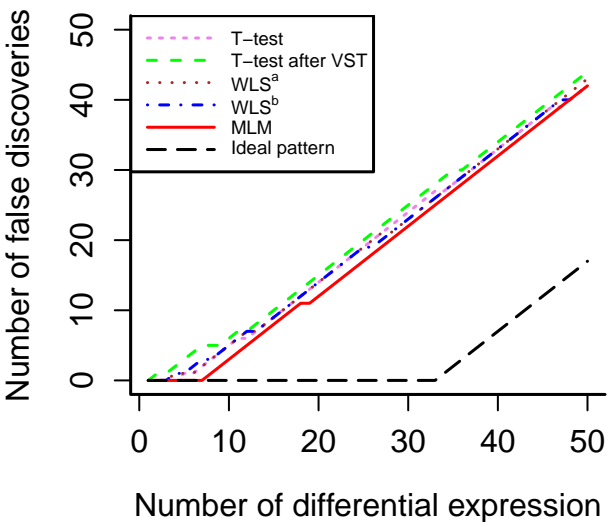

### B 0.1 vs. 0 pM

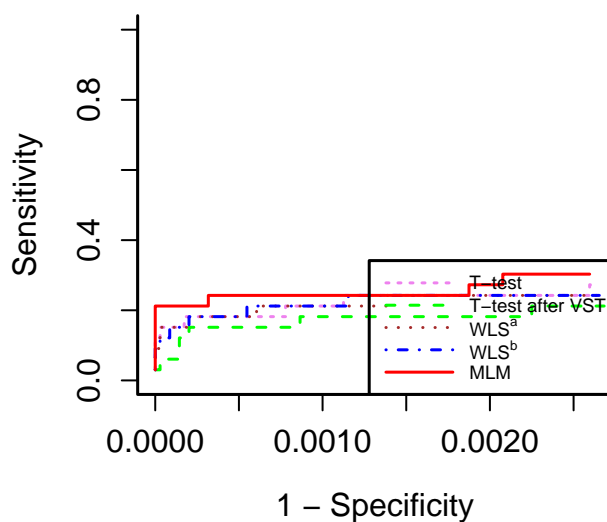

### A 0.3 vs. 0 pM

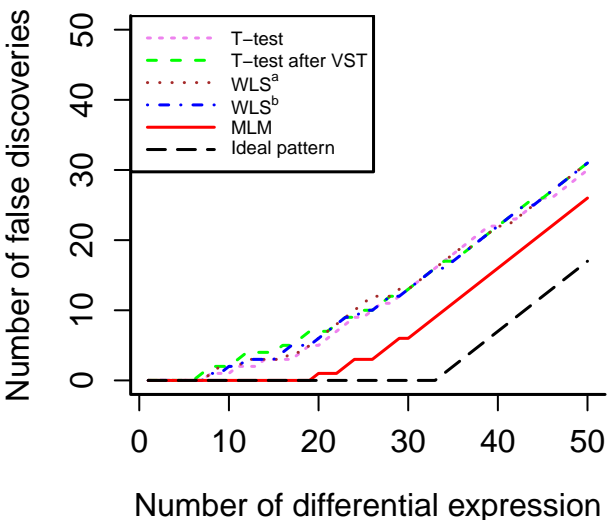

### B 0.3 vs. 0 pM

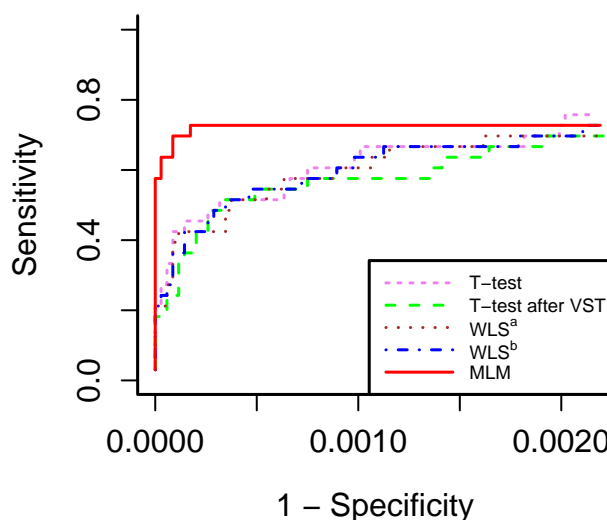

### A 1 vs. 0 pM

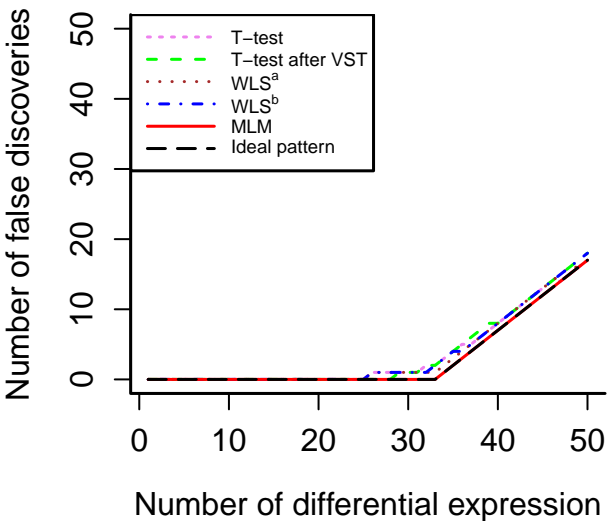

### B 1 vs. 0 pM

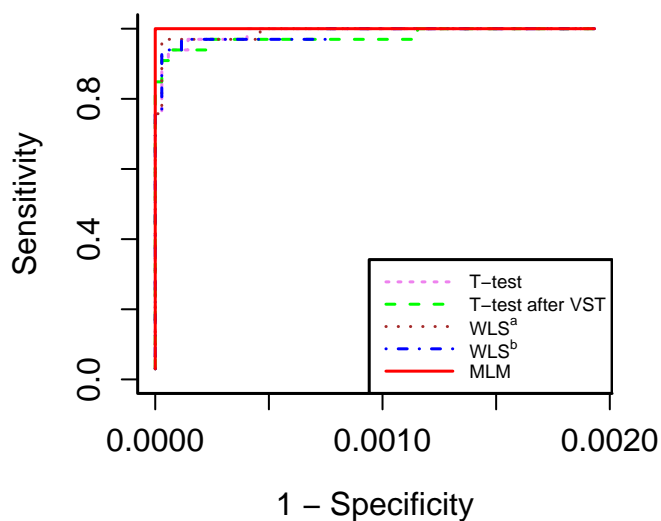

### A 3 vs. 0 pM

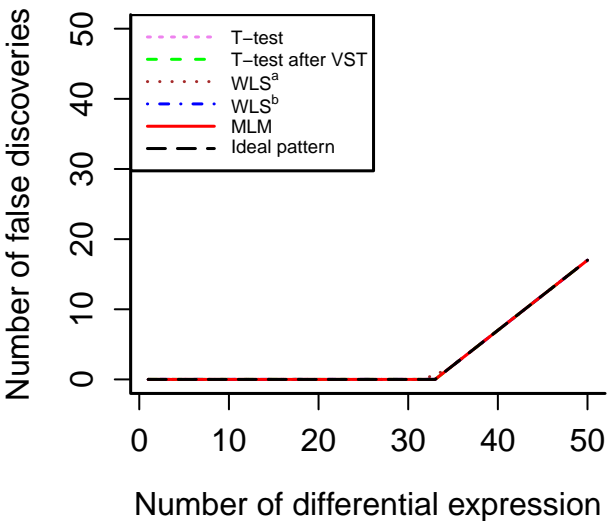

### B 3 vs. 0 pM

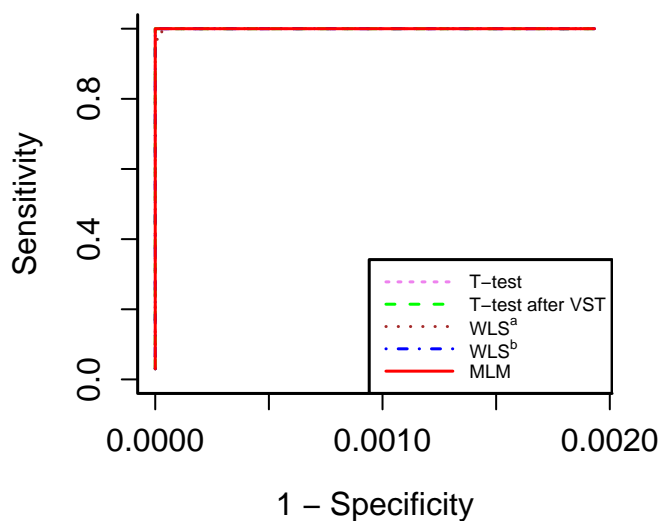

### A 10 vs. 0 pM

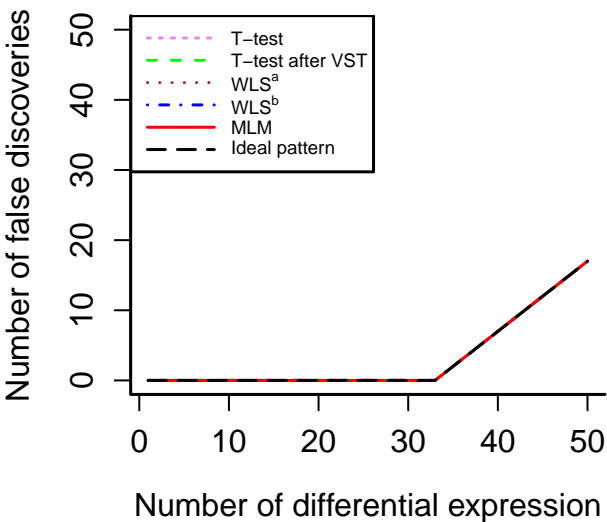

### B 10 vs. 0 pM

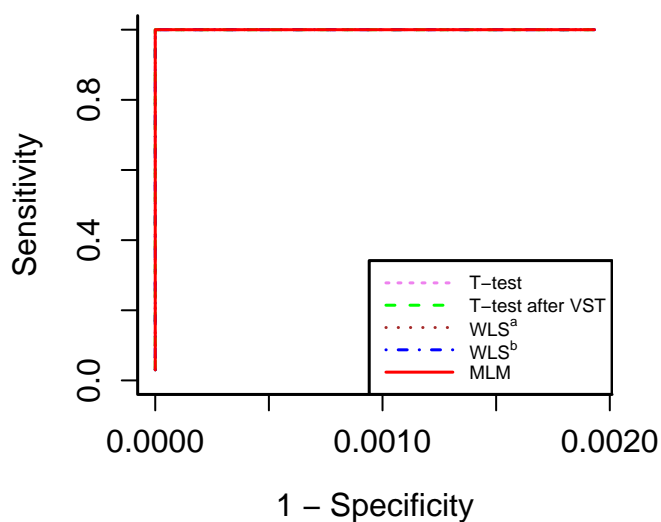

### A 30 vs. 0 pM

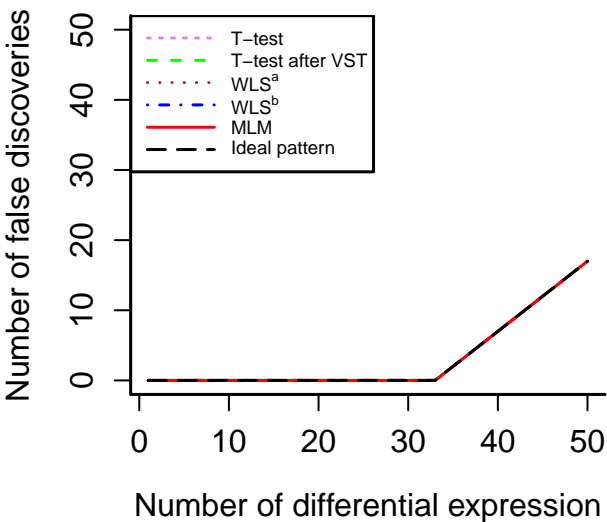

### B 30 vs. 0 pM

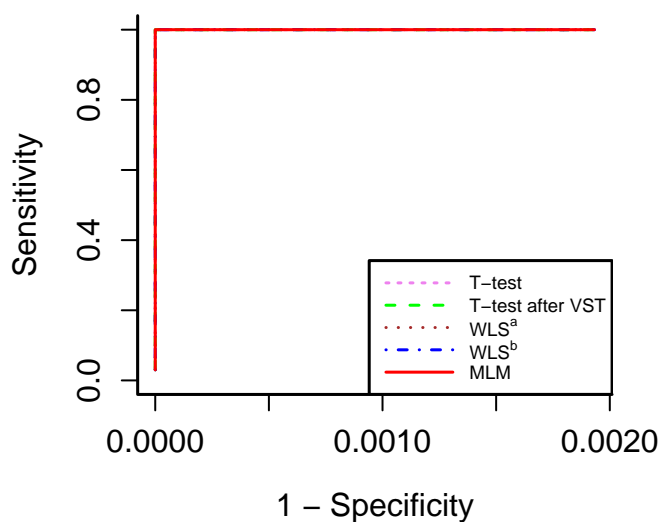

### A 100 vs. 0 pM

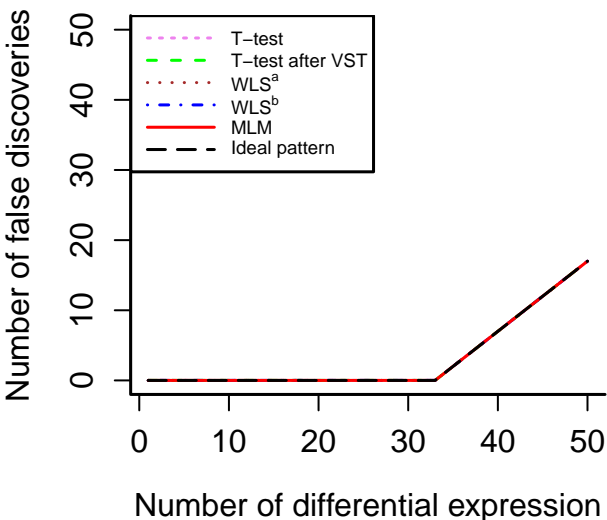

### B 100 vs. 0 pM

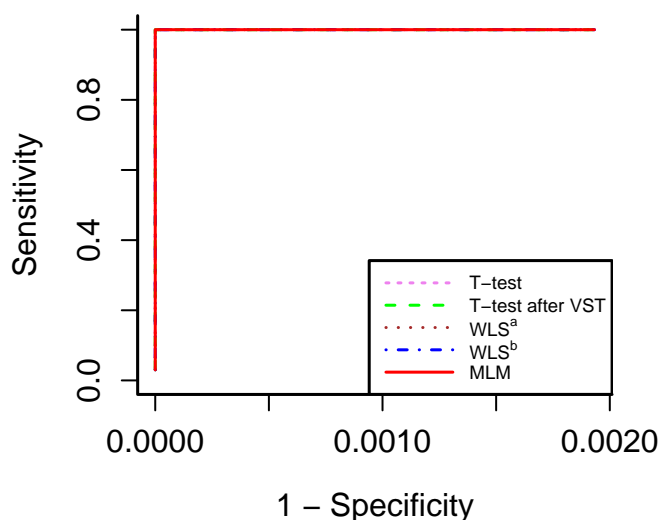

### A 300 vs. 0 pM

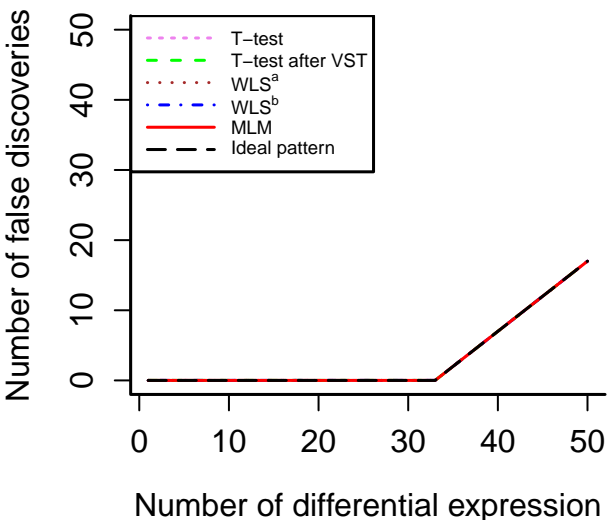

### B 300 vs. 0 pM

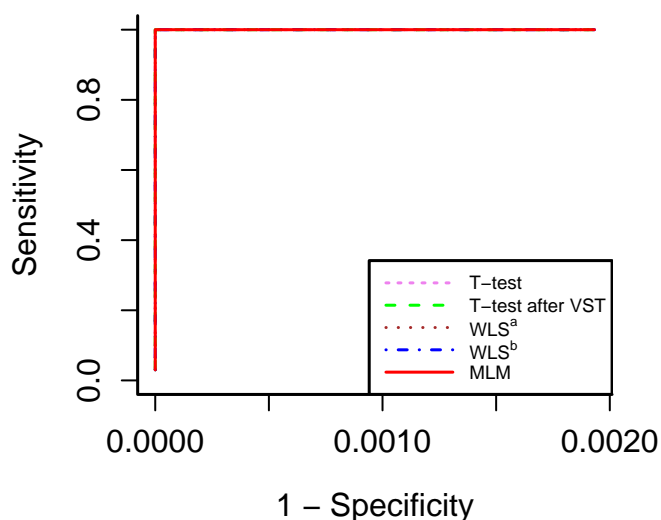

# A 1000 vs. 0 pM

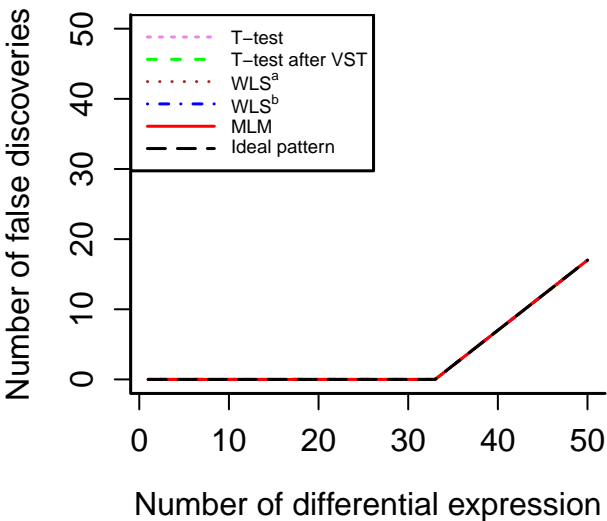

# B 1000 vs. 0 pM

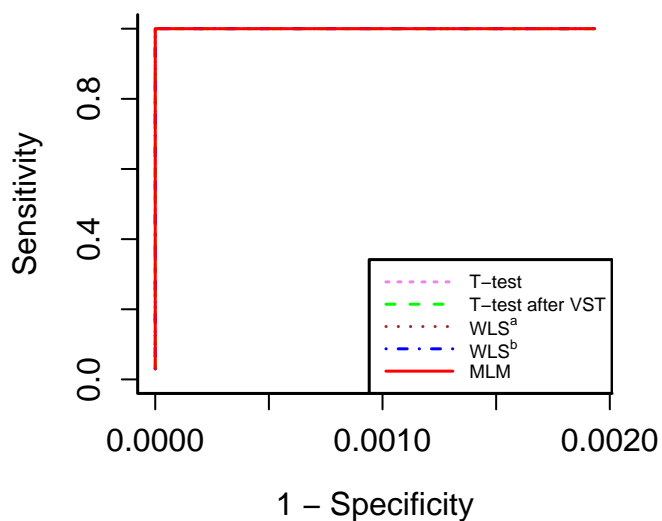

Supplement: supp_btq708_bioinf-2010-1562-File005.pdf [file supp_btq708_bioinf-2010-1562-File005.pdf]
